# Supplementary material for: Cover cropping can be a stronger determinant than host crop identity for arbuscular mycorrhizal fungal communities colonizing maize and soybean
Source: PubMed Central journal article supplement (PMC6369830; doi:10.7717/peerj.6403), 2019-02-08
Supplement: peerj-07-6403-s001.pdf [file peerj-07-6403-s001.pdf]

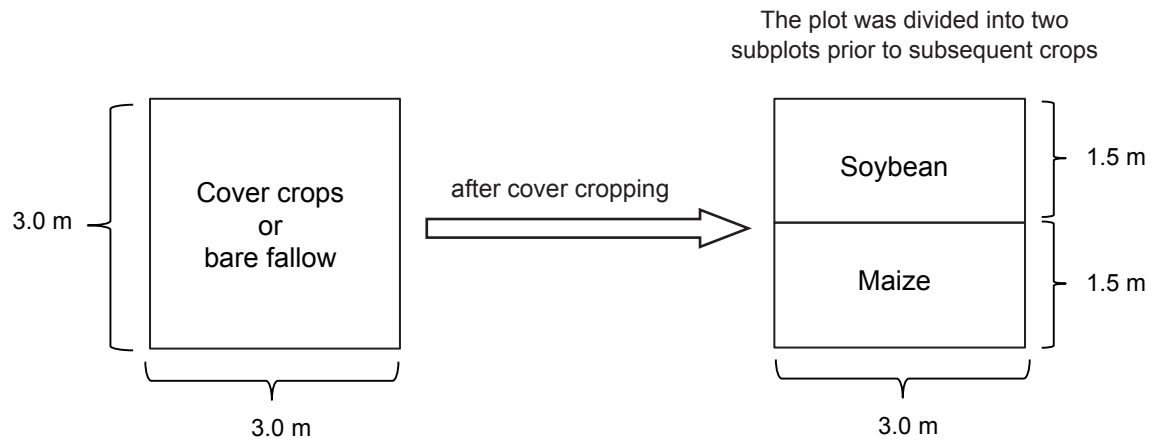

| Cover crop managements | Sowing cover crops | Subsequent host crops | Sowing subsequent crops |
|------------------------|--------------------|-----------------------|-------------------------|
| Italian ryegrass       | November 9, 2016   | Soybean and maize     | May 29, 2017            |
| Hairy vetch            | November 9, 2016   | Soybean and maize     | May 29, 2017            |
| Brown mustard          | November 9, 2016   | Soybean and maize     | May 29, 2017            |
| Bare fallow            | —                  | Soybean and maize     | May 29, 2017            |
