# Supplementary material for: Cover cropping can be a stronger determinant than host crop identity for arbuscular mycorrhizal fungal communities colonizing maize and soybean
Source: PubMed Central journal article supplement (PMC6369830; doi:10.7717/peerj.6403), 2019-02-08

A

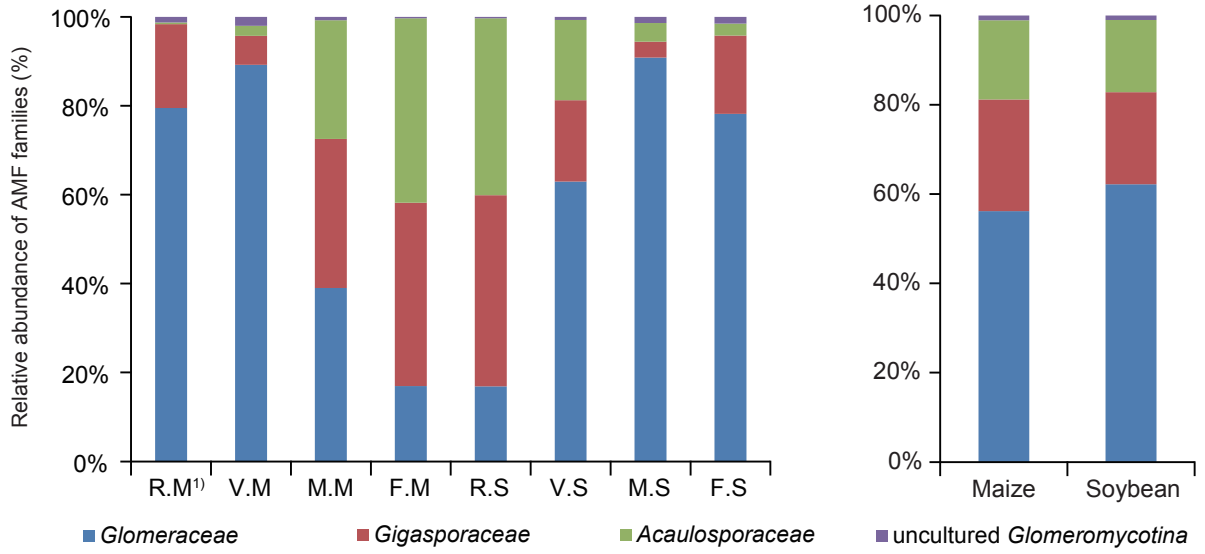

B

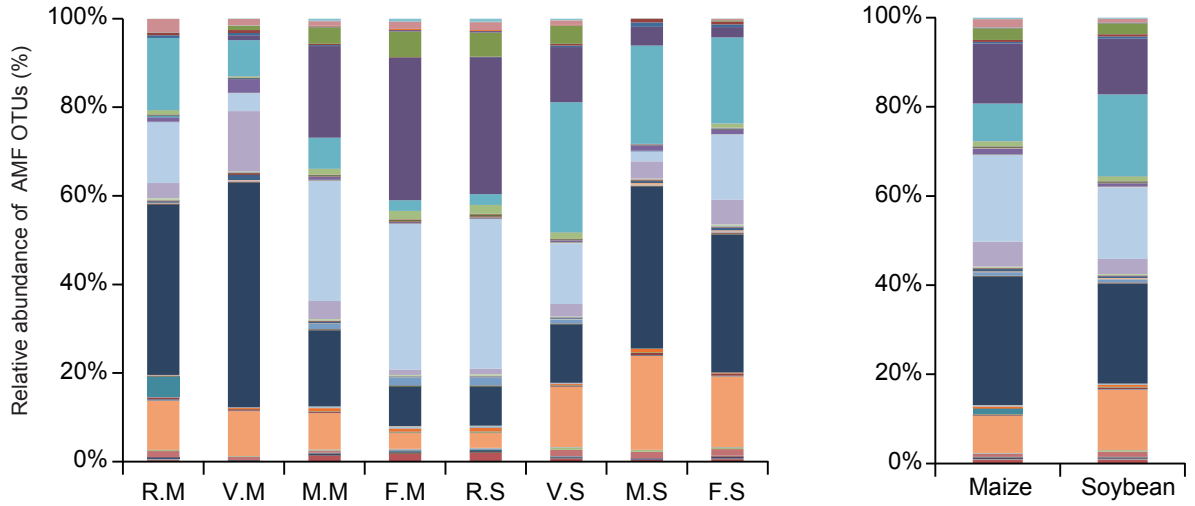

Supplement: peerj-07-6403-s002.pdf [file peerj-07-6403-s002.pdf]
