# Supplementary material for: Cover cropping can be a stronger determinant than host crop identity for arbuscular mycorrhizal fungal communities colonizing maize and soybean
Source: PeerJ. 2019 Feb 8;7:e6403. doi: 10.7717/peerj.6403 (PMC6369830; doi:10.7717/peerj.6403)
Supplement: Supplemental Information 3 [file peerj-07-6403-s003.xlsx]

## Sheet: Table 1
Table S1. Soil biochemical properties after cultivation of winter cover crops or bare fallow.
Cover crops	Soil pH		EC		Available soil P		EE-GRSP		T-GRSP
	(H2O)		(μS/cm)		(mg/kg)		(mg/g)		(mg/g)
Italian ryegrass	5.56667	ab1)	78.8889	ab	69.7694	a	0.876801	a	1.83305	a
Hairy vetch	5.77778	a	154.444	a	64.8698	a	0.838004	a	1.6879	a
Brown mustard	5.54444	ab	151.111	a	70.2497	a	0.883648	a	1.84401	a
Fallow	5.43333	b	38.8889	b	44.0228	a	0.848502	a	1.2975	b
1) Different letters within the same column for each variable among the cover crop systems show a significant difference by Tukey’s test at the 5% level.
