# Supplementary material for: Cover cropping can be a stronger determinant than host crop identity for arbuscular mycorrhizal fungal communities colonizing maize and soybean
Source: PeerJ. 2019 Feb 8;7:e6403. doi: 10.7717/peerj.6403 (PMC6369830; doi:10.7717/peerj.6403)
Supplement: Supplemental Information 5 [file peerj-07-6403-s005.xlsx]

## Sheet: Sheet4
Table S3: Generalist or specialist found from root samples among cover cropping treatments.
OTU No.	Ryegrass	Hairy vetch	Brown mustard	Bare fallow	Relative abundance in ryegrass (%)	Relative abundance in hairy vetch (%)	Relative abundance in mustard (%)	Relative abundance in fallow (%)	Ryegrass vs fallow	Vetch vs Fallow	Mustard vs Fallow	Description	Accession No.
OTU101	76	76	135	99	0.0504327	0.0504327	0.0895843	0.0656952	Generalist	Generalist	Specialist mustard	Gigaspora margarita partial 18S rRNA gene, strain BEG34, isolate spore 3, clone BS2_4_2	HF968814
OTU130	1555	1368	2223	1832	1.03188	0.907788	1.47516	1.21569	Generalist	Generalist	Specialist mustard	Scutellospora castanea partial 18S rRNA gene, isolate BEG1	AJ418851
OTU1656	33	17	13	17	0.0218984	0.011281	0.00862664	0.011281	Generalist	Generalist	Generalist	Uncultured Glomeromycota clone OTU19 18S ribosomal RNA gene, partial sequence	KC464527
OTU1813	104	107	30	112	0.0690131	0.0710039	0.0199076	0.0743218	Generalist	Generalist	Specialist fallow	Uncultured Glomus partial 18S rRNA gene, isolate 3C1 VT403, clone IK2YRTO01DRRW0	LT216986
OTU2018	6	1	7	7	0.00398153	0.000663588	0.00464511	0.00464511	Too rare	Too rare	Specialist fallow	Uncultured Glomus partial 18S rRNA gene, isolate G14, clone I6BWJM101AG8IM	LT672485
OTU2055	48	1	1	0	0.0318522	0.000663588	0.000663588	0	Specialist ryegrass	Too rare	Too rare	Uncultured Rhizophagus partial 18S rRNA gene, clone STOR1-5	HG380113
OTU2173	247	0	0	0	0.163906	0	0	0	Specialist ryegrass	No-detected	No-detected	Acaulospora laevis small subunit ribosomal RNA gene, partial sequence	AF131041
OTU220	30	37	14	47	0.0199076	0.0245527	0.00929023	0.0311886	Generalist	Generalist	Specialist fallow	Rhizophagus clarus isolate S768-2 18S ribosomal RNA gene, partial sequence	KP144311
OTU2214	98	98	163	89	0.0650316	0.0650316	0.108165	0.0590593	Generalist	Specialist vetch	Specialist mustard	Uncultured Glomeromycotina partial 18S rRNA gene, isolate GVyCP8 VTX00026, clone HNI0JTB01CP6H1	LT829826
OTU223	200	240	377	454	0.132718	0.159261	0.250173	0.301269	Generalist	Generalist	Generalist	Scutellospora savannicola partial 18S rRNA gene, isolate Att1455-2, clone pCK075-3	HE962475
OTU2323	192	197	321	201	0.127409	0.130727	0.213012	0.133381	Generalist	Generalist	Specialist mustard	Racocetra alborosea strain S2 18S ribosomal RNA gene, partial sequence	KJ792102
OTU2497	1	1	10	113	0.000663588	0.000663588	0.00663588	0.0749854	Specialist fallow	Specialist fallow	Specialist fallow	Uncultured Rhizophagus clone RAL58 18S ribosomal RNA gene, partial sequence	KF386320
OTU2668	128	133	201	122	0.0849392	0.0882572	0.133381	0.0809577	Generalist	Generalist	Specialist mustard	Uncultured Acaulospora partial 18S rRNA gene, isolate MUyAA VTX00026, clone GAMF5028	LN620307
OTU2772	1130	580	359	1178	0.749854	0.384881	0.238228	0.781706	Generalist	Specialist fallow	Specialist fallow	Uncultured Glomus partial 18S rRNA gene, isolate B10C VT143, clone 71_cloned	HG329704
OTU2854	179	136	146	332	0.118782	0.0902479	0.0968838	0.220311	Generalist	Specialist fallow	Specialist fallow	Uncultured Glomeraceae clone L22HS64__OTU_48 18S ribosomal RNA gene, partial sequence	KF489093
OTU2940	97	75	98	106	0.064368	0.0497691	0.0650316	0.0703403	Generalist	Generalist	Generalist	Glomus clarum gene for 18S ribosomal RNA, partial sequence, clone:DGGE8	AB193053
OTU298	70	62	133	99	0.0464511	0.0411424	0.0882572	0.0656952	Generalist	Generalist	Specialist mustard	Uncultured Racocetra clone L22LS59__OTU_33 18S ribosomal RNA gene, partial sequence	KF488892
OTU3150	11056	10301	8865	14561	7.33662	6.83562	5.8827	9.6625	Generalist	Specialist fallow	Specialist fallow	Uncultured Glomus partial 18S rRNA gene, isolate CassB8 VT99, clone IK2YRTO01AJ0D5	LT217431
OTU3547	214	105	84	153	0.142008	0.0696767	0.0557414	0.101529	Generalist	Generalist	Specialist fallow	Uncultured Glomeromycota clone R-LP5b-2 18S ribosomal RNA gene, partial sequence	KM522671
OTU3600	345	331	186	370	0.228938	0.219648	0.123427	0.245527	Generalist	Generalist	Specialist fallow	Uncultured Glomeromycota clone OTU06 18S ribosomal RNA gene, partial sequence	KC764923
OTU3736	103	137	187	175	0.0683495	0.0909115	0.124091	0.116128	Generalist	Generalist	Generalist	Uncultured Glomus partial 18S rRNA gene, isolate CassC1 VT90, clone IK2YRTO01BSZGU	LT217508
OTU3845	116	95	155	76	0.0769762	0.0630408	0.102856	0.0504327	Generalist	Generalist	Specialist mustard	Uncultured Scutellospora partial 18S rRNA gene, isolate M11, clone I6BWJM101CH187	LT672460
OTU3854	3593	0	0	0	2.38427	0	0	0	Specialist ryegrass	No-detected	No-detected	Rhizophagus sp. MAY-2012 clone F84_1 18S ribosomal RNA gene, partial sequence	JN859555
OTU3958	615	674	979	668	0.408106	0.447258	0.649652	0.443277	Generalist	Specialist vetch	Generalist	Uncultured Racocetra clone L3HS96__OTU_33 18S ribosomal RNA gene, partial sequence	KF489299
OTU3966	104	4	0	0	0.0690131	0.00265435	0	0	Specialist ryegrass	Too rare	Too rare	Uncultured Glomeromycota clone INRD19 18S ribosomal RNA gene, partial sequence	KF612336
OTU3969	37	61	73	39	0.0245527	0.0404788	0.0484419	0.0258799	Generalist	Generalist	Specialist mustard	Uncultured Acaulospora clone L22HS240__OTU_7 18S ribosomal RNA gene, partial sequence	KF489002
OTU4018	2	2	4	8	0.00132718	0.00132718	0.00265435	0.0053087	Too rare	Too rare	Specialist fallow	Uncultured Glomus partial 18S rRNA gene, isolate 3A9 VT247, clone IK2YRTO01AGL9C	LT216833
OTU4209	125	130	202	145	0.0829485	0.0862664	0.134045	0.0962202	Generalist	Generalist	Specialist mustard	Uncultured Racocetra clone L22LS217__OTU_33 18S ribosomal RNA gene, partial sequence	KF488869
OTU441	202	229	333	168	0.134045	0.151962	0.220975	0.111483	Generalist	Specialist vetch	Specialist mustard	Acaulospora spinosa clone A93 18S ribosomal RNA gene, partial sequence	KY020877
OTU4412	60	57	99	116	0.0398153	0.0378245	0.0656952	0.0769762	Generalist	Generalist	Specialist mustard	Uncultured Gigaspora clone L22HS09__OTU_29 18S ribosomal RNA gene, partial sequence	KF489037
OTU479	35607	44904	19646	30114	23.6284	29.7977	13.0368	19.9833	Generalist	Generalist	Specialist fallow	Uncultured Glomus partial 18S rRNA gene, isolate CassC1 VT90, clone IK2YRTO01BSZGU	LT217508
OTU4906	66	40	18	36	0.0437968	0.0265435	0.0119446	0.0238892	Generalist	Generalist	Specialist fallow	Uncultured Glomus clone Gra-69 18S ribosomal RNA gene, partial sequence	KX808929
OTU5287	137	132	225	180	0.0909115	0.0875936	0.149307	0.119446	Generalist	Generalist	Specialist mustard	Racocetra sp. FAS-2017a isolate CMPC739.2 small subunit ribosomal RNA gene, partial sequence	KX529097
OTU5488	2	1	1	0	0.00132718	0.000663588	0.000663588	0	Too rare	Specialist fallow	Too rare	Uncultured Glomus partial 18S rRNA gene, isolate CassC1 VT90, clone IK2YRTO01BSZGU	LT217508
OTU560	53	37	38	70	0.0351701	0.0245527	0.0252163	0.0464511	Generalist	Specialist fallow	Generalist	Uncultured Glomus partial 18S rRNA gene, isolate B10C VT143, clone 71_cloned	HG329704
OTU5627	132	89	127	215	0.0875936	0.0590593	0.0842756	0.142671	Generalist	Generalist	Generalist	Uncultured Glomeraceae clone L3HS156__OTU_63 18S ribosomal RNA gene, partial sequence	KF489370
OTU5636	1416	1504	2297	1456	0.93964	0.998036	1.52426	0.966184	Generalist	Specialist vetch	Specialist mustard	Uncultured Acaulospora partial 18S rRNA gene, isolate MUyAA VTX00026, clone GAMF5028	LN620307
OTU5742	21	102	29	76	0.0139353	0.0676859	0.019244	0.0504327	Specialist fallow	Generalist	Specialist fallow	Uncultured Glomeromycota clone OTU06 18S ribosomal RNA gene, partial sequence	KC764923
OTU5922	39	33	17	49	0.0258799	0.0218984	0.011281	0.0325158	Generalist	Generalist	Specialist fallow	Uncultured Glomeromycota clone OTU06 18S ribosomal RNA gene, partial sequence	KC764923
OTU5985	50	31	13	60	0.0331794	0.0205712	0.00862664	0.0398153	Generalist	Generalist	Specialist fallow	Uncultured Glomus partial 18S rRNA gene, isolate 3A9 VT247, clone IK2YRTO01AGL9C	LT216833
OTU6090	81	81	117	76	0.0537506	0.0537506	0.0776398	0.0504327	Generalist	Generalist	Specialist mustard	Uncultured Acaulospora partial 18S rRNA gene, isolate OUEVOPV8 VTX00028, clone I6BWJM102H66UB	LT723309
OTU628	112	119	66	187	0.0743218	0.0789669	0.0437968	0.124091	Generalist	Generalist	Specialist fallow	Uncultured Glomus clone 10K-130448 18S small subunit ribosomal RNA gene, partial sequence	MG429387
OTU6461	299	940	296	517	0.198413	0.623772	0.196422	0.343075	Generalist	Generalist	Specialist fallow	Uncultured Glomeromycotina partial 18S rRNA gene, isolate TAxDS9 VTX00092, clone HNI0JTB01ASTTY	LT833094
OTU6472	141	330	142	114	0.0935659	0.218984	0.0942294	0.075649	Generalist	Generalist	Generalist	Uncultured Glomus partial 18S rRNA gene, isolate BAxCO VTX00295, clone GAMF1220	LN616499
OTU6478	23	81	39	57	0.0152625	0.0537506	0.0258799	0.0378245	Generalist	Generalist	Generalist	Uncultured Glomeromycota clone 1 18S ribosomal RNA gene, partial sequence	KC708373
OTU6885	0	22	1	35	0	0.0145989	0.000663588	0.0232256	Specialist fallow	Generalist	Specialist fallow	Uncultured Glomeromycota clone JAHT50L02IH9X1 small subunit ribosomal RNA gene, partial sequence	KY349897
OTU6988	8	7	6	28	0.0053087	0.00464511	0.00398153	0.0185805	Generalist	Generalist	Specialist fallow	Uncultured Glomus partial 18S rRNA gene, isolate 3A9 VT247, clone IK2YRTO01AGL9C	LT216833
OTU700	1	0	0	0	0.000663588	0	0	0	Too rare	No-detected	Specialist fallow	Uncultured Glomus partial 18S rRNA gene, isolate B10C VT143, clone 71_cloned	HG329704
OTU7014	45	50	14	51	0.0298614	0.0331794	0.00929023	0.033843	Generalist	Generalist	Specialist fallow	Uncultured Glomus clone Y50 18S ribosomal RNA gene, partial sequence	KM659256
OTU7253	10	22	3	3	0.00663588	0.0145989	0.00199076	0.00199076	Too rare	Specialist vetch	Specialist fallow	Uncultured Glomus partial 18S rRNA gene, isolate G5, clone I6BWJM101C8TI2	LT672571
OTU7262	540	352	514	600	0.358337	0.233583	0.341084	0.398153	Generalist	Generalist	Generalist	Uncultured Racocetraceae clone L3HS97__OTU_19 18S ribosomal RNA gene, partial sequence	KF489253
OTU7384	3510	11178	3975	5146	2.32919	7.41758	2.63776	3.41482	Generalist	Generalist	Generalist	Rhizophagus irregularis partial 18S rRNA gene, strain DAOM181602, isolate spore 2, clone ES2_5_4	HF968834
OTU7390	35132	27877	45316	36548	23.3132	18.4988	30.0711	24.2528	Generalist	Generalist	Specialist mustard	Cetraspora pellucida strain CB15074 18S ribosomal RNA gene, partial sequence	KX879059
OTU7596	11	12	21	24	0.00729946	0.00796305	0.0139353	0.0159261	Generalist	Generalist	Generalist	Uncultured Racocetraceae clone L3HS39__OTU_17 18S ribosomal RNA gene, partial sequence	KF489252
OTU7792	52	54	20	59	0.0345066	0.0358337	0.0132718	0.0391517	Generalist	Generalist	Specialist fallow	Uncultured Glomeraceae clone gra-41 18S ribosomal RNA gene, partial sequence	KM220274
OTU780	38	6	10	30	0.0252163	0.00398153	0.00663588	0.0199076	Generalist	Specialist fallow	Specialist fallow	Uncultured Glomeromycota clone R-LP1b-27 18S ribosomal RNA gene, partial sequence	KM522519
OTU7813	67	68	131	89	0.0444604	0.045124	0.08693	0.0590593	Generalist	Generalist	Specialist mustard	Gigaspora margarita partial 18S rRNA gene, strain BEG34, isolate spore 3, clone BS2_4_2	HF968814
OTU7951	945	2485	716	921	0.62709	1.64902	0.475129	0.611164	Generalist	Specialist vetch	Generalist	Uncultured Glomus partial 18S rRNA gene, isolate 3C1 VT312, clone IKXC9GJ01CSNL6	LT216981
OTU8109	271	12	4	3	0.179832	0.00796305	0.00265435	0.00199076	Specialist ryegrass	Generalist	Too rare	uncultured Glomus genomic DNA sequence contains 18S rRNA gene, isolate LPwGM8 VT140, clone IRERXRB01DCNJP	LT934674
OTU8131	163	149	217	167	0.108165	0.0988746	0.143999	0.110819	Generalist	Generalist	Specialist mustard	Uncultured Gigaspora clone L22LS99__OTU_29 18S ribosomal RNA gene, partial sequence	KF488868
OTU8288	43	16	17	41	0.0285343	0.0106174	0.011281	0.0272071	Generalist	Specialist fallow	Specialist fallow	Uncultured Glomus partial 18S rRNA gene, isolate BP11RM2 VT143, clone 16140_cloned	HF568368
OTU8311	6	9	5	6	0.00398153	0.00597229	0.00331794	0.00398153	Too rare	Generalist	Specialist fallow	Uncultured Glomus partial 18S rRNA gene, isolate 3C1 VT403, clone IK2YRTO01DRRW0	LT216986
OTU8375	225	219	422	301	0.149307	0.145326	0.280034	0.19974	Generalist	Generalist	Specialist mustard	Uncultured Racocetra clone L3HS07__OTU_34 18S ribosomal RNA gene, partial sequence	KF489325
OTU8388	0	40	0	1	0	0.0265435	0	0.000663588	Too rare	Specialist vetch	No-detected	Uncultured Glomeromycota clone JAHT50L02IH9X1 small subunit ribosomal RNA gene, partial sequence	KY349897
OTU8441	50	150	34	71	0.0331794	0.0995381	0.022562	0.0471147	Generalist	Generalist	Specialist fallow	Uncultured Glomus clone 10K-130448 18S small subunit ribosomal RNA gene, partial sequence	MG429387
OTU8487	85	50	32	69	0.0564049	0.0331794	0.0212348	0.0457875	Generalist	Generalist	Generalist	Uncultured Glomerales gene for 18S ribosomal RNA, partial sequence, isolate: DGGE band B	LC274502
OTU8515	1	0	0	141	0.000663588	0	0	0.0935659	Specialist fallow	Specialist fallow	Specialist fallow	Uncultured Glomeraceae clone L22HS64__OTU_48 18S ribosomal RNA gene, partial sequence	KF489093
OTU8668	76	79	126	97	0.0504327	0.0524234	0.083612	0.064368	Generalist	Generalist	Specialist mustard	Racocetra sp. FAS-2017a isolate CMPC739.30 small subunit ribosomal RNA gene, partial sequence	KX529103
OTU8822	2222	1652	2419	2226	1.47449	1.09625	1.60522	1.47715	Generalist	Generalist	Specialist mustard	Gigaspora margarita partial 18S rRNA gene, strain BEG34, isolate spore 3, clone BS2_4_7	HF968813
OTU9132	6	22	5	4	0.00398153	0.0145989	0.00331794	0.00265435	Too rare	Generalist	Specialist fallow	Uncultured Glomus partial 18S rRNA gene, isolate G5, clone I6BWJM101C8TI2	LT672571
OTU9139	14095	7959	7096	16494	9.35327	5.28149	4.70882	10.9452	Generalist	Specialist fallow	Specialist fallow	Uncultured Glomus partial 18S rRNA gene, isolate SALKOPV3 VTX00143, clone I2R3EJD01DGO01	LT723917
OTU9193	24237	25047	39792	25054	16.0834	16.6209	26.4055	16.6255	Generalist	Specialist vetch	Specialist mustard	Uncultured Acaulospora genomic DNA sequence contains 18S rRNA gene, OTU NS31_112	LN890608
OTU9362	448	413	195	499	0.297287	0.274062	0.1294	0.33113	Generalist	Generalist	Specialist fallow	Uncultured Glomus partial 18S rRNA gene, isolate 3A9 VT247, clone IK2YRTO01AGL9C	LT216833
OTU9417	509	586	289	545	0.337766	0.388862	0.191777	0.361655	Generalist	Generalist	Specialist fallow	Uncultured Glomus partial 18S rRNA gene, isolate CassB8 VT90, clone IK2YRTO01CZDT7	LT217424
OTU9473	4379	5114	7199	4276	2.90585	3.39359	4.77717	2.8375	Generalist	Generalist	Specialist mustard	Uncultured Acaulospora partial 18S rRNA gene, isolate B2HA VTX00026, clone GAMF1025	LN616304
OTU9495	251	251	410	261	0.16656	0.16656	0.272071	0.173196	Generalist	Specialist vetch	Specialist mustard	Uncultured Acaulospora partial 18S rRNA gene, isolate GVyLJ-7 VT44, clone 81_cloned	HE798716
OTU9560	37	0	0	1	0.0245527	0	0	0.000663588	Specialist ryegrass	Too rare	Too rare	Uncultured Glomus partial 18S rRNA gene, isolate G5, clone I6BWJM101BAV3P	LT672572
OTU958	188	176	285	205	0.124754	0.116791	0.189122	0.136035	Generalist	Generalist	Specialist mustard	Uncultured Scutellospora clone VTX00049 (185) small subunit ribosomal RNA gene, partial sequence	KY588325
OTU9627	21	42	15	40	0.0139353	0.0278707	0.00995381	0.0265435	Generalist	Generalist	Specialist fallow	Uncultured Glomus clone Glo-20 18S ribosomal RNA gene, partial sequence	KT762239
OTU9639	3474	2297	1951	1531	2.3053	1.52426	1.29466	1.01595	Specialist ryegrass	Specialist vetch	Specialist mustard	uncultured Gigaspora partial 18S rRNA gene, clone 4SaD_od	AM946769
OTU981	53	36	16	42	0.0351701	0.0238892	0.0106174	0.0278707	Generalist	Generalist	Generalist	Uncultured Glomerales gene for 18S ribosomal RNA, partial sequence, isolate: DGGE band B	LC274502
OTU9878	78	78	127	79	0.0517598	0.0517598	0.0842756	0.0524234	Generalist	Generalist	Specialist mustard	Uncultured Acaulospora partial 18S rRNA gene, isolate MUyAA VTX00026, clone GAMF5028	LN620307
OTU9917	474	487	844	514	0.314541	0.323167	0.560068	0.341084	Generalist	Generalist	Specialist mustard	Uncultured Acaulospora partial 18S rRNA gene, isolate MUyAA VTX00026, clone GAMF5028	LN620307
