# Supplementary material for: Cover cropping can be a stronger determinant than host crop identity for arbuscular mycorrhizal fungal communities colonizing maize and soybean
Source: PeerJ. 2019 Feb 8;7:e6403. doi: 10.7717/peerj.6403 (PMC6369830; doi:10.7717/peerj.6403)
Supplement: Supplemental Information 6 [file peerj-07-6403-s006.xlsx]

## Sheet: Sheet4
Table S4: Generalist or specialist found from both maize and soybean root samples.
OTU No.	Maize (OTU abundance)	Soybean (OTU abundance)	Relative abundance in maize (%)	Relative abundance in soybean (%)	Generalist or specialist	Description	Accession No.
OTU101	135	129	0.0447922	0.0428014	Generalist	Gigaspora margarita partial 18S rRNA gene, strain BEG34, isolate spore 3, clone BS2_4_2	HF968814
OTU130	2558	2616	0.848729	0.867973	Generalist	Scutellospora castanea partial 18S rRNA gene, isolate BEG1	AJ418851
OTU1656	55	41	0.0182487	0.0136035	Generalist	Uncultured Glomeromycota clone OTU19 18S ribosomal RNA gene, partial sequence	KC464527
OTU1813	225	287	0.0746536	0.0952248	Generalist	Uncultured Glomus partial 18S rRNA gene, isolate 3C1 VT403, clone IK2YRTO01DRRW0	LT216986
OTU2018	12	61	0.00398153	0.0202394	Specialist soybean	Uncultured Glomus partial 18S rRNA gene, isolate G14, clone I6BWJM101AG8IM	LT672485
OTU2055	48	0	0.0159261	0	Specialist maize	Uncultured Rhizophagus partial 18S rRNA gene, clone STOR1-5	HG380113
OTU2173	247	0	0.0819531	0	Specialist maize	Acaulospora laevis small subunit ribosomal RNA gene, partial sequence	AF131041
OTU220	71	146	0.0235574	0.0484419	Generalist	Rhizophagus clarus isolate S768-2 18S ribosomal RNA gene, partial sequence	KP144311
OTU2214	163	110	0.0540824	0.0364973	Generalist	Uncultured Glomeromycotina partial 18S rRNA gene, isolate GVyCP8 VTX00026, clone HNI0JTB01CP6H1	LT829826
OTU223	419	583	0.139022	0.193436	Generalist	Scutellospora savannicola partial 18S rRNA gene, isolate Att1455-2, clone pCK075-3	HE962475
OTU2323	344	301	0.114137	0.0998699	Generalist	Racocetra alborosea strain S2 18S ribosomal RNA gene, partial sequence	KJ792102
OTU2497	10	115	0.00331794	0.0381563	Specialist soybean	Uncultured Rhizophagus clone RAL58 18S ribosomal RNA gene, partial sequence	KF386320
OTU2668	206	173	0.0683495	0.0574003	Generalist	Uncultured Acaulospora partial 18S rRNA gene, isolate MUyAA VTX00026, clone GAMF5028	LN620307
OTU2772	1959	3385	0.649984	1.12312	Generalist	Uncultured Glomus partial 18S rRNA gene, isolate B10C VT143, clone 71_cloned	HG329704
OTU2854	415	1022	0.137694	0.339093	Specialist soybean	Uncultured Glomeraceae clone L22HS64__OTU_48 18S ribosomal RNA gene, partial sequence	KF489093
OTU2940	170	157	0.0564049	0.0520916	Generalist	Glomus clarum gene for 18S ribosomal RNA, partial sequence, clone:DGGE8	AB193053
OTU298	145	128	0.0481101	0.0424696	Generalist	Uncultured Racocetra clone L22LS59__OTU_33 18S ribosomal RNA gene, partial sequence	KF488892
OTU3150	24876	40744	8.2537	13.5186	Generalist	Uncultured Glomus partial 18S rRNA gene, isolate CassB8 VT99, clone IK2YRTO01AJ0D5	LT217431
OTU3547	361	394	0.119778	0.130727	Generalist	Uncultured Glomeromycota clone R-LP5b-2 18S ribosomal RNA gene, partial sequence	KM522671
OTU3600	762	873	0.252827	0.289656	Generalist	Uncultured Glomeromycota clone OTU06 18S ribosomal RNA gene, partial sequence	KC764923
OTU3736	235	391	0.0779715	0.129731	Generalist	Uncultured Glomus partial 18S rRNA gene, isolate CassC1 VT90, clone IK2YRTO01BSZGU	LT217508
OTU3845	176	109	0.0583957	0.0361655	Generalist	Uncultured Scutellospora partial 18S rRNA gene, isolate M11, clone I6BWJM101CH187	LT672460
OTU3854	3593	0	1.19214	0	Specialist maize	Rhizophagus sp. MAY-2012 clone F84_1 18S ribosomal RNA gene, partial sequence	JN859555
OTU3958	1332	1423	0.441949	0.472143	Generalist	Uncultured Racocetra clone L3HS96__OTU_33 18S ribosomal RNA gene, partial sequence	KF489299
OTU3966	108	3	0.0358337	0.000995381	Specialist maize	Uncultured Glomeromycota clone INRD19 18S ribosomal RNA gene, partial sequence	KF612336
OTU3969	97	113	0.032184	0.0374927	Generalist	Uncultured Acaulospora clone L22HS240__OTU_7 18S ribosomal RNA gene, partial sequence	KF489002
OTU4018	4	34	0.00132718	0.011281	Specialist soybean	Uncultured Glomus partial 18S rRNA gene, isolate 3A9 VT247, clone IK2YRTO01AGL9C	LT216833
OTU4209	207	198	0.0686813	0.0656952	Generalist	Uncultured Racocetra clone L22LS217__OTU_33 18S ribosomal RNA gene, partial sequence	KF488869
OTU441	360	228	0.119446	0.075649	Generalist	Acaulospora spinosa clone A93 18S ribosomal RNA gene, partial sequence	KY020877
OTU4412	102	155	0.033843	0.051428	Generalist	Uncultured Gigaspora clone L22HS09__OTU_29 18S ribosomal RNA gene, partial sequence	KF489037
OTU479	86765	67545	28.7881	22.411	Generalist	Uncultured Glomus partial 18S rRNA gene, isolate CassC1 VT90, clone IK2YRTO01BSZGU	LT217508
OTU4906	110	111	0.0364973	0.0368291	Generalist	Uncultured Glomus clone Gra-69 18S ribosomal RNA gene, partial sequence	KX808929
OTU5287	244	237	0.0809577	0.0786351	Generalist	Racocetra sp. FAS-2017a isolate CMPC739.2 small subunit ribosomal RNA gene, partial sequence	KX529097
OTU5488	2	32	0.000663588	0.0106174	Specialist soybean	Uncultured Glomus partial 18S rRNA gene, isolate CassC1 VT90, clone IK2YRTO01BSZGU	LT217508
OTU560	94	195	0.0311886	0.0646998	Generalist	Uncultured Glomus partial 18S rRNA gene, isolate B10C VT143, clone 71_cloned	HG329704
OTU5627	224	298	0.0743218	0.0988746	Generalist	Uncultured Glomeraceae clone L3HS156__OTU_63 18S ribosomal RNA gene, partial sequence	KF489370
OTU5636	2387	2041	0.791992	0.677191	Generalist	Uncultured Acaulospora partial 18S rRNA gene, isolate MUyAA VTX00026, clone GAMF5028	LN620307
OTU5742	150	149	0.0497691	0.0494373	Generalist	Uncultured Glomeromycota clone OTU06 18S ribosomal RNA gene, partial sequence	KC764923
OTU5922	87	167	0.0288661	0.0554096	Generalist	Uncultured Glomeromycota clone OTU06 18S ribosomal RNA gene, partial sequence	KC764923
OTU5985	92	177	0.030525	0.0587275	Generalist	Uncultured Glomus partial 18S rRNA gene, isolate 3A9 VT247, clone IK2YRTO01AGL9C	LT216833
OTU6090	117	119	0.0388199	0.0394835	Generalist	Uncultured Acaulospora partial 18S rRNA gene, isolate OUEVOPV8 VTX00028, clone I6BWJM102H66UB	LT723309
OTU628	271	501	0.0899161	0.166229	Generalist	Uncultured Glomus clone 10K-130448 18S small subunit ribosomal RNA gene, partial sequence	MG429387
OTU6461	1421	1007	0.471479	0.334116	Generalist	Uncultured Glomeromycotina partial 18S rRNA gene, isolate TAxDS9 VTX00092, clone HNI0JTB01ASTTY	LT833094
OTU6472	531	277	0.176183	0.0919069	Generalist	Uncultured Glomus partial 18S rRNA gene, isolate BAxCO VTX00295, clone GAMF1220	LN616499
OTU6478	131	119	0.043465	0.0394835	Generalist	Uncultured Glomeromycota clone 1 18S ribosomal RNA gene, partial sequence	KC708373
OTU6885	23	35	0.00763126	0.0116128	Generalist	Uncultured Glomeromycota clone JAHT50L02IH9X1 small subunit ribosomal RNA gene, partial sequence	KY349897
OTU6988	17	38	0.00564049	0.0126082	Generalist	Uncultured Glomus partial 18S rRNA gene, isolate 3A9 VT247, clone IK2YRTO01AGL9C	LT216833
OTU700	1	60	0.000331794	0.0199076	Specialist soybean	Uncultured Glomus partial 18S rRNA gene, isolate B10C VT143, clone 71_cloned	HG329704
OTU7014	105	143	0.0348384	0.0474465	Generalist	Uncultured Glomus clone Y50 18S ribosomal RNA gene, partial sequence	KM659256
OTU7253	33	46	0.0109492	0.0152625	Generalist	Uncultured Glomus partial 18S rRNA gene, isolate G5, clone I6BWJM101C8TI2	LT672571
OTU7262	970	827	0.32184	0.274393	Generalist	Uncultured Racocetraceae clone L3HS97__OTU_19 18S ribosomal RNA gene, partial sequence	KF489253
OTU7384	16837	10230	5.58641	3.39425	Generalist	Rhizophagus irregularis partial 18S rRNA gene, strain DAOM181602, isolate spore 2, clone ES2_5_4	HF968834
OTU7390	58725	48537	19.4846	16.1043	Generalist	Cetraspora pellucida strain CB15074 18S ribosomal RNA gene, partial sequence	KX879059
OTU7596	22	59	0.00729946	0.0195758	Generalist	Uncultured Racocetraceae clone L3HS39__OTU_17 18S ribosomal RNA gene, partial sequence	KF489252
OTU7792	114	194	0.0378245	0.064368	Generalist	Uncultured Glomeraceae clone gra-41 18S ribosomal RNA gene, partial sequence	KM220274
OTU780	50	97	0.0165897	0.032184	Generalist	Uncultured Glomeromycota clone R-LP1b-27 18S ribosomal RNA gene, partial sequence	KM522519
OTU7813	132	156	0.0437968	0.0517598	Generalist	Gigaspora margarita partial 18S rRNA gene, strain BEG34, isolate spore 3, clone BS2_4_2	HF968814
OTU7951	3758	2065	1.24688	0.685154	Generalist	Uncultured Glomus partial 18S rRNA gene, isolate 3C1 VT312, clone IKXC9GJ01CSNL6	LT216981
OTU8109	287	12	0.0952248	0.00398153	Specialist maize	uncultured Glomus genomic DNA sequence contains 18S rRNA gene, isolate LPwGM8 VT140, clone IRERXRB01DCNJP	LT934674
OTU8131	247	220	0.0819531	0.0729946	Generalist	Uncultured Gigaspora clone L22LS99__OTU_29 18S ribosomal RNA gene, partial sequence	KF488868
OTU8288	68	169	0.022562	0.0560732	Generalist	Uncultured Glomus partial 18S rRNA gene, isolate BP11RM2 VT143, clone 16140_cloned	HF568368
OTU8311	14	62	0.00464511	0.0205712	Specialist soybean	Uncultured Glomus partial 18S rRNA gene, isolate 3C1 VT403, clone IK2YRTO01DRRW0	LT216986
OTU8375	430	384	0.142671	0.127409	Generalist	Uncultured Racocetra clone L3HS07__OTU_34 18S ribosomal RNA gene, partial sequence	KF489325
OTU8388	40	1	0.0132718	0.000331794	Specialist maize	Uncultured Glomeromycota clone JAHT50L02IH9X1 small subunit ribosomal RNA gene, partial sequence	KY349897
OTU8441	222	169	0.0736582	0.0560732	Generalist	Uncultured Glomus clone 10K-130448 18S small subunit ribosomal RNA gene, partial sequence	MG429387
OTU8487	149	148	0.0494373	0.0491055	Generalist	Uncultured Glomerales gene for 18S ribosomal RNA, partial sequence, isolate: DGGE band B	LC274502
OTU8515	1	141	0.000331794	0.0467829	Specialist soybean	Uncultured Glomeraceae clone L22HS64__OTU_48 18S ribosomal RNA gene, partial sequence	KF489093
OTU8668	133	128	0.0441286	0.0424696	Generalist	Racocetra sp. FAS-2017a isolate CMPC739.30 small subunit ribosomal RNA gene, partial sequence	KX529103
OTU8822	3393	3300	1.12578	1.09492	Generalist	Gigaspora margarita partial 18S rRNA gene, strain BEG34, isolate spore 3, clone BS2_4_7	HF968813
OTU9132	31	87	0.0102856	0.0288661	Generalist	Uncultured Glomus partial 18S rRNA gene, isolate G5, clone I6BWJM101C8TI2	LT672571
OTU9139	25532	55357	8.47136	18.3671	Specialist soybean	Uncultured Glomus partial 18S rRNA gene, isolate SALKOPV3 VTX00143, clone I2R3EJD01DGO01	LT723917
OTU9193	40604	37606	13.4722	12.4774	Generalist	Uncultured Acaulospora genomic DNA sequence contains 18S rRNA gene, OTU NS31_112	LN890608
OTU9362	1020	1487	0.33843	0.493377	Generalist	Uncultured Glomus partial 18S rRNA gene, isolate 3A9 VT247, clone IK2YRTO01AGL9C	LT216833
OTU9417	1234	1425	0.409434	0.472806	Generalist	Uncultured Glomus partial 18S rRNA gene, isolate CassB8 VT90, clone IK2YRTO01CZDT7	LT217424
OTU9473	7934	7341	2.63245	2.4357	Generalist	Uncultured Acaulospora partial 18S rRNA gene, isolate B2HA VTX00026, clone GAMF1025	LN616304
OTU9495	410	347	0.136035	0.115132	Generalist	Uncultured Acaulospora partial 18S rRNA gene, isolate GVyLJ-7 VT44, clone 81_cloned	HE798716
OTU9560	37	1	0.0122764	0.000331794	Specialist maize	Uncultured Glomus partial 18S rRNA gene, isolate G5, clone I6BWJM101BAV3P	LT672572
OTU958	297	286	0.0985428	0.094893	Generalist	Uncultured Scutellospora clone VTX00049 (185) small subunit ribosomal RNA gene, partial sequence	KY588325
OTU9627	70	109	0.0232256	0.0361655	Generalist	Uncultured Glomus clone Glo-20 18S ribosomal RNA gene, partial sequence	KT762239
OTU9639	5344	2290	1.77311	0.759808	Specialist maize	uncultured Gigaspora partial 18S rRNA gene, clone 4SaD_od	AM946769
OTU981	103	80	0.0341748	0.0265435	Generalist	Uncultured Glomerales gene for 18S ribosomal RNA, partial sequence, isolate: DGGE band B	LC274502
OTU9878	127	109	0.0421378	0.0361655	Generalist	Uncultured Acaulospora partial 18S rRNA gene, isolate MUyAA VTX00026, clone GAMF5028	LN620307
OTU9917	857	752	0.284347	0.249509	Generalist	Uncultured Acaulospora partial 18S rRNA gene, isolate MUyAA VTX00026, clone GAMF5028	LN620307
